# Supplementary material for: Whole-Exome Sequencing of Cell-Free DNA Reveals Temporo-spatial Heterogeneity and Identifies Treatment-Resistant Clones in Neuroblastoma
Source: Oxford University Press journal article supplement (doi:10.1158/1078-0432.ccr-17-1586), 2017-11-30
Supplement: 10780432ccr171586-sup-184262_2_supp_4384572_zz7lml.xlsx [file 10780432ccr171586-sup-184262_2_supp_4384572_zz7lml.xlsx]

## Sheet: table s1 Patients Data
Case Number	INSS Stage	Diagnosis	2nd Timepoint		Last News		Number of studied sequential plasma samples	Primary Tumor Genetic Alteration		Pathological Diagnosis		Sequencing of the primary tumor			Plasma volume (µL)		Plasma : Quantity of DNA per mL(ng)		Quality of CtDNA (200bp peak ratio)		cfDNA input for sequencing		WES cfDNA On target		WES cfDNA duplicates		WES ctDNA content 2		Copy Number Available on cfDNA	Copy Number alterations detected by sequencing of primary tumor and cfDNA analysis (Specific to one technique ; disappeared during follow-up)			Number of SNVs detected using WES			Seemingly relapse specific SNVs detected at subclonal level at diagnosis using deep coverage target sequencing (genes of neuritogenesis pathway in bold, of cell cycle in italics)
		Age (M)	delay diag-2nd Timepoint (M)	Status	delay diag-last news (M)	Status		MYCN status	Genomic Copy Number Profile	Histology	% tumor cell 1	Diagnosis (0: None, 1 : Roche ; 2 : Agilent ; 3 : WGS)	% tumor cell 2	Relapse (0: None, 1 : Roche ; 2 : Agilent ; 3 : WGS)	Diag	Relapse/2nd Timepoint	Diag	Relapse/2nd Timepoint	Diag	Relapse/2nd Timepoint	Diag	Relapse/2nd Timepoint	Diag	Relapse/2nd Timepoint	Diag	Relapse/2nd Timepoint	Diagnosis	2nd timepoint	0 : None ; 1 : Diag ; 2 : relapse ; 3 : both	tumor	cfDNA	New CNA at relapse on cfDNA	SNVs in primary tumor	SNVs in cfDNA at diagnosis	New SNVs at relapse/2nd TP in cfDNA (or tumor studied at relapse)	Number	Gene
1	4	20	7	SD	14	Dead	3	A	Numerical	NOS NB	95	2	0.34	0	300	300	13533.3	71	0.96	0.97	100	20	0.8	0.86	14%	33%	42%	0.3	1	MYCNA, 2+, 3-, 4+, 6+, 7+, 8+, 9-, 10-, 11-, Amplification on 12 (MDM2, PTPRB), 13+, 15+, 17+, 18+, 20+, 21-	MYCN, 2+, 3-, 4+, 6+, 7+, 8+, 9-, 10-, 11-, Amplification on 12 (MDM2, PTPRB), 13+, 15+, gain on 15 (IGF1R), 17+, 18+, 20+, 21-		16	19	1	0
2*	3	4	53	CR	47	Alive	6	A	Segmental	NOS NB	60	2	0.92	0	200	400	406	104	>10%	0.63	20	30	0.7	0.88	25%	29%	30%	0.64	2	Amplification on 1, MYCNA, 2+, Amplification on 2 (SF3B1), 3q-, 6+, 7q+, 9-, 11-, 12+, 14-, 15-, 17q+, 19p-, 22+	Amplification on 1, MYCNA, 2+, Amplification on 2 (SF3B1), 3q-, 6+, 7q+, 9-, 11-, 12+, 14-, 15-, 17q+, 19p-, 22+		28	26		0
3	4	25	7	CR	50	Alive	7	A	Segmental	poorly differentiated NB	90	2	0.88	0	400	400	2170	193	0.81	0.95	100	50	0.69	0.86	16%	27%	70%	0.25	1	Very Noisy (1p-, MYCNA, 9p-, 9q+, 15q+) ; germline deletion on 15 (SLC12A6)	1p- , MYCNA, 9p-, 9q+, 15q+ ; germline deletion on chr 15 (SLC12A6)		27	38		0
4	3	19	6	CR	51	Alive	6	A	Segmental	poorly differentiated NB	90	2	0.93	0	300	500	76	262	0.95	0.95	20	100	0.71	0.86	21%	25%	61%	0.05	1	1p-, MYCNA, 3p-, loss on 4, 6q-, 17q+, 18q+, 23q+	1p-, MYCNA, 3p-, loss on 4, 6q-, 17q+, 18q+, 23q+		24	59		0
5	4	47	6	CR	40	Alive	4	NA	Segmental	poorly differentiated NB	90	2	0.91	0	400	100	1295	1267	0.7	0.3	100	100	0.7	0.85	16%	25%	99%	0	1	Very Noisy (3p-, 4p-, 6p+, 7+, 11q-, 17q+, 18+)	3p-, 4p-, 6p+, 7+, 11q-, 17q+, 18+		24	55		0
6	4	101	1	PR	7	Dead	4	A	Segmental	indifferentiated NB	70	2	0.98	0	300	300	794	371	0.94	0.73	100	100	0.68	0.86	17%	25%	75%	0.28	1	1p- , 1q+, MYCNA, 2+, 7+, 17q+	1p- , 1q+, MYCNA, 2+, 7+, 17q+		20	40	1	0
7	4s	3	7	PD	16	Dead	4	A	Segmental	poorly differentiated NB	98	2	0.9	0	300	300	1248	3617	0.21	0.15	200	300	0.69	0.7	15%	13%	58%	0.62	3	Noisy (1p-, 2p+, MYCNA, 17q-, 17q+)	1p-, 2p+, MYCNA, 17q-, 17q+		17	25	27	0
8	4	19	12	CR	27	Alive	6	A	Segmental	poorly differentiated NB	MD	1	0.95	0	500	300	1113	232	0.95	0.56	100	50	0.69	0.86	18%	27%	93%	0.4	1	1p-, MYCNA, 17q+	1p-, MYCNA, 17q+		12	35	0	0
9	3	20	4	CR	36	Alive	6	A	Segmental	poorly differentiated NB	50	1	0.32	0	400	300	2328	73	0.87	0.95	100	20	0.68	0.87	14%	31%	92%	0.4	1	Noisy MYCNA	1p-, 2p+, MYCNA, 10q-, 17q+		12	78	1	0
10	4	32	27	relapse	31	Dead	2	NA	Segmental	poorly differentiated NB	50	1	0.82	0	800	1750	387	368	0.97	>10%	100	100	0.84	0.87	37%	63%	82%	0.43	1	2p+, 3p-, 3q+, Amplification on 5p, 6p+, 6p-, 7q+, Gain on 8, 9+, 11q-, 12q+, 16q+, 16q-, 17q++	2p+, 3p-, 3q+, Amplification on 5p, 6p+, 6p-, 7q+, Gain on 8, 9+, 11q-, 12q+, 16q+, 16q-, 17q++		17	23	18	0
11	4	11	23	relapse	31	Dead	2	NA	Segmental	poorly differentiated NB	90	3	0.89	3	1500	1000	639	105	0.35	0.7	100	30	0.87	0.87	36%	41%	86%	0.8	3	1p-, 2p+, 11q-, 12q+, 17q++, 19p-	Very Noisy (1p-, 2p+, 11q-, 12q+, 17q++, 19p-)	16p-, 16q+	33	36	16 (17)	2	APOBR, FAT4
12	1	58	8	relapse	69	Alive	2	NA	Segmental	ganglioneuroblastoma	80	3	0.94	3	200	1500	210	137	>10%	0.73	30	50	0.87	0.88	58%	37%	3%	0.89	2	7+, 11p+, 11q-, 12q+, loss on 13, 17p-, 17q+, 18p-, 18q+, 19p-		3p-, 20p-, 12+	24	23	9 (6)	0
13	4	31	22	relapse	24	Dead	2	NA	Segmental	poorly differentiated NB	90	3	0.94	3	800	200	1278	364	0.77	0.83	100	20	0.87	0.87	29%	36%	88%	0.5	3	1p-, 1q+, 7p+, 10p+, 11q-, 12q+, 16q+, 16q-, 17q+, 18+, loss on 22 (RBX1, XRCC6)	1p-, 1q+, 2p-, 2p+, 7p+, 7q+, 10p+, 11q-, 12q+, 16q+, 16q-, 17q+, 18+, loss on 22 (RBX1, XRCC6)	3p- , loss on 10	14	69	47 (49)	7	ITGA1, ZNF624, ANKRD17, TAF4, FGF10, FBN3,CHD6
14	4	14	9	relapse	11	Dead	1	A	Segmental	poorly differentiated NB	60	3	0.23	3	700	/	930	/	0.84	/	100	/	0.86	/	0.29	/	0.9	/	1	1p-, 1q+, 2p+, MYCNA, 5+, 7+, 12+, 13+, 14+, 17+, 17q+, 20p-, 21+, 22+	1p-, 1q+, 2p+, MYCNA, 5+, 7+, 12+, 13+, 14+, 17+, 17q+, 20p-, 21+, 22+	no cfDNA at relapse	87	134	(103)	2	HM13 , SAAL1
15	4	30	17	relapse	18	Dead	2	NA	Segmental	NOS NB	60	1	0.18	0	200	1500	1530	376	0.89	0.95	50	100	0.87	0.87	29%	26%	33%	0.77	3	1p-, 1+, 2+, 5p-, Amplification on 6, 7+, 13-, 17++, 18+, 22+	1p-, 1+, 2+, 5p-, 7+, 13-, 17++, 18+, 22+	1q+, Amplification on 12 (CDK4), 22q-	15	36	55	4	CDKN2D, MYOM2, TOB1, ADRA2B
16	4	66	26	relapse	49	Alive	2	NA	Segmental	poorly differentiated NB	MD	1	0.86	0	800	200	39	65	0.76	0.93	30	30	0.86	0.86	30%	30%	48%	0.73	3	1q+, 1q-, 2p+, 3p-, 4p-, 8q+, 11p+, 11q-, 13q+, 17q+	1q+, 1q-, 3p-, 4p-, 8q+, 11p+, 11q-, 13q+, 17q+	loss on 2 (BCL11A), loss on 4, 6p+, 7p+, gain on 7 (CDK6), 8q++, 12q+, Xp+	32	36	23	2	HTN3, MDC1
17	2	30	14	relapse	21	Dead	2	NA	Segmental	poorly differentiated NB	MD	2	0.15	0	2000	3300	26	30	0.86	0.83	30	30	0.85	0.86	35%	31%	52%	0.58	1	2p+, 2 Amplifications on 12 (CDK4,MDM2, PTPRB, UBC, RAN), 2 Amplifications on 22 (PIM3)	2 Amplification on 12 (CDK4,MDM2, PTPRB, UBC, RAN), 2 Amplification on 22 (PIM3)		21	12	0	0
18	2	9	/	/	12	Dead	1	NA	Segmental	poorly differentiated NB	90	1	0.77	0	200	/	350	/	0.72	/	30	/	0.86	/	0.34	/	0.38	/	1	1p-, 1q+, 4q+, 8p-, 8q-, 19q-	Noisy (1p-, 1q+, 4q+, 8p-, 8q-, 19q-)	no relapse	14	14		0
19	4	18	14	relapse	21	Dead	2	A	Segmental	poorly differentiated NB	MD	1	0.94	0	2200	500	42	1210	0.78	>10%	100	7	0.86	0.83	35%	53%	17%	0.75	1	1p-, MYCNA, 4q+, gain on 7, 7q-, 11q-, loss on 12q, 13q-, 14q-, 17p-, 17q+, 20p-	1p-, MYCNA, 4q+, gain on 7, 7q-, 11q-, loss on 12q, 13q-, 14q-, 17p-, 17q+, 20p-		17	13	0	0
