# Supplementary material for: Whole-Exome Sequencing of Cell-Free DNA Reveals Temporo-spatial Heterogeneity and Identifies Treatment-Resistant Clones in Neuroblastoma
Source: Oxford University Press journal article supplement (doi:10.1158/1078-0432.ccr-17-1586), 2017-11-30
Supplement: 10780432ccr171586-sup-184262_2_supp_4384573_mz7lml.xlsx [file 10780432ccr171586-sup-184262_2_supp_4384573_mz7lml.xlsx]

## Sheet: table s2 Time points
Case	Sampe Type	Plasma Timepoint (months from diagnosis)	Disease Status	Treatment	Plasma volume (µl)	Plasma : Quantity of cfDNA per mL (ng/ml)	Sequencing technics
Case 1	plasma	0	Primary Tumor + metastasis (Bone, Liver, Medullar)	Diagnosis	300	13533.3	WES/Target
	p	4.9	PR Primary Tumor PD metastasis	After 2nd line chemotherapy	900	177.333	Target
	p	6.8	SD Primary Tumor PR metastasis	After 3rd line chemotherapy	300	70.7	WES/Target
Case 2	s	0	Primary Tumor	Diagnosis	200	406	WES/Target
	p	52		local relapse	400	104.125	WES/Target
	p	55		during 1st line chemotherapy	400	71.575	Target
	p	56		during 1st line chemotherapy	500	54.88	Target
	p	57	PR Primary Tumor	Before surgery	1000	68.95	Target
	s	57	PR Primary Tumor	After surgery	700	478	Target
Case 3	p	0	Primary Tumor + Bone Marrow Metastasis	Diagnosis	400	2170	WES/Target
	p	0.9		during 1st line chemotherapy	1000	1064	Target
	p	1.4		during 1st line chemotherapy	800	129.5	Target
	p	2.96667	PR Primary Tumor CR metastasis	after 1st line chemotherapy	900	381.111	Target
	p	6.23333	PR Primary Tumor CR metastasis	After 2nd line chemotherapy	1000	60.55	Target
	p	6.5	PR Primary Tumor CR metastasis	Before surgery	400	192.5	WES/Target
	p	11.1	PR Primary Tumor	After radiotherapy	1000	60.55	Target
Case 4	p	0	Primary Tumor	Diagnosis	300	76.3	WES/Target
	p	0.766667	SD Primary Tumor	during 1st line chemotherapy	600	35.8167	Target
	p	1.46667	SD Primary Tumor	during 1st line chemotherapy	600	52.85	Target
	p	3.1	CR Primary Tumor	Before surgery	800	104.125	Target
	p	5.63333	CR Primary Tumor	Before radiotherapy	500	261.8	WES/Target
	p	6.63333	CR Primary Tumor	After radiotherapy	800	228.375	Target
Case 5	pmo	0	Primary Tumor + Metastasis	Diagnosis	400	1295	WES/Target
	pmo	3.26667	PR Primary Tumor PR metastasis	Before surgery	1000	749	Target
	pmo	5.6	CR Primary Tumor CR metastasis	Before radiotherapy	100	1267	WES/Target
	pmo	12.1333	CR Primary Tumor CR metastasis	During monitoring chemotherapy	600	1283.33	Target
Case 6	p	0	Primary Tumor + Metastasis	Diagnosis	300	784	WES/Target
	p	1.43333		during 1st line chemotherapy	300	371	WES/Target
	p	2.83333	PR Primary Tumor PR metastasis	after 1st line chemotherapy	1000	23.94	Target
	p	4.23333	CR Primary Tumor PD metastasis	during 2nd line chemotherapy	600	57.1667	Target
Case 7	pmo	0	Primary Tumor + Liver Metastasis	Diagnosis	300	1248.33	WES/Target
	p	6.03333	PR Primary Tumor PD metastasis	Before chemotherapy HD	1000	31.5	Target
	pmo	6.7	PR Primary Tumor PD metastasis	Before chemotherapy HD	300	3616.67	WES/Target
	p	16.2667	PD metastasis	After Autotransplant	800	3150	Target
Case 8	p	0	Primary Tumor + Metastasis	Diagnosis	500	1113	WES/Target
	p	1.4	PR Primary Tumor CR metastasis	during 1st line chemotherapy	400	46.2	Target
	p	2.8	PR Primary Tumor CR metastasis	during 1st line chemotherapy	400	58.975	Target
	p	3.7	PR Primary Tumor CR metastasis	Before surgery	350	232	WES/Target
	p	4.43333	CR Primary Tumor CR metastsis	Before chemotherapy HD	400	27.3	Target
	p	9.93333	CR Primary Tumor CR metastsis	During monitoring chemotherapy	400	38.5	Target
Case 9	p	0	Primary Tumor + Metastasis	Diagnosis	400	2327.5	WES/Target
	p	0.633333	PR Primary Tumor CR metastasis	during 1st line chemotherapy	600	175	Target
	p	1.23333	PR Primary Tumor CR metastasis	during 1st line chemotherapy	1000	24.15	Target
	p	2.4	PR Primary Tumor CR metastasis	after 1st line chemotherapy	400	87.5	Target
	p	3.73333	CR Primary Tumor CR metastsis	After surgery	600	61.8333	Target
	p	4.4	CR Primary Tumor CR metastsis	After chemotherapy HD	350	73	WES/Target
Case 10	p	0	Primary Tumor + Metastasis	Diagnosis	800	387	WES/Target
	p	27	PD	Relapse	1750	368	WES/Target
Case 11	p	0	Primary Tumor + Metastasis	Diagnosis	1500	639	WES/Target
	p	23	PD	Relapse	1000	105	WES/Target
Case 12	p	0	Primary Tumor	Diagnosis	200	210	WES/Target
	p	8	PD	Relapse	1500	137	WES/Target
Case 13	p	0	Primary Tumor + Metastasis	Diagnosis	800	1278	WES/Target
	p	22	PD	Relapse	200	364	WES/Target
Case 14	p	0	Primary Tumor + Metastasis	Diagnosis	700	930	WES/Target
Case 15	p	0	Primary Tumor + Metastasis	Diagnosis	200	1530	WES/Target
	p	17	PD	Relapse	1500	376	WES/Target
Case 16	p	0	Primary Tumor + Metastasis	Diagnosis	800	39	WES/Target
	p	26	PD	Relapse	200	65	WES/Target
Case 17	p	0	Primary Tumor	Diagnosis	2000	26	WES/Target
	p	14	PD	Relapse	3300	30	WES/Target
Case 18	p	0	Primary Tumor	Diagnosis	200	350	WES/Target
Case 19	p	0	Primary Tumor + Metastasis	Diagnosis	2200	42	WES/Target
	p	14	PD	Relapse	500	1210	WES/Target
